Structural bioinformatics

# Self-consistency test reveals systematic bias in programs for prediction change of stability upon mutation

Dinara R. Usmanova<sup>1</sup>, Natalya S. Bogatyreva<sup>2,3,4</sup>, Joan Ariño Bernad<sup>5</sup>, Aleksandra A. Eremina<sup>6</sup>, Anastasiya A. Gorshkova<sup>7</sup>, German M. Kanevskiy<sup>8</sup>, Lyubov R. Lonishin<sup>9</sup>, Alexander V. Meister<sup>10</sup>, Alisa G. Yakupova<sup>7</sup>, Fyodor A. Kondrashov<sup>11</sup> and Dmitry N. Ivankov<sup>4,11,\*</sup>

<sup>1</sup>Department of Systems Biology, Columbia University Medical Center, New York, NY 10032, USA, <sup>2</sup>Bioinformatics and Genomics Programme, Centre for Genomic Regulation (CRG), Barcelona 08003, Spain, <sup>3</sup>Universitat Pompeu Fabra (UPF), Barcelona 08003, Spain, <sup>4</sup>Laboratory of Protein Physics, Institute of Protein Research of the Russian Academy of Sciences, Pushchino, Moscow Region 142290, Russia, <sup>5</sup>Centre de Formació Interdisciplinària Superior, Universitat Politècnica de Catalunya, Barcelona 08028, Spain, <sup>6</sup>School of Biological Sciences, College of Science and Engineering, University of Edinburgh, Edinburgh EH9 3BF, UK, <sup>7</sup>Biological Faculty, Lomonosov Moscow State University, Moscow 119991, Russia, <sup>8</sup>Higher Chemical College of the Russian Academy of Sciences, Moscow 125047, Russia, <sup>9</sup>Faculty of Technical Physics, Institute of Physics, Nanotechnology and Telecommunications, Peter the Great Saint-Petersburg Polytechnic University, Saint-Petersburg 195251, Russia, <sup>10</sup>Department of Medicine, Novosibirsk State University, Novosibirsk 630090, Russia and <sup>11</sup>Institute of Science and Technology, Klosterneuburg 3400, Austria

\*To whom correspondence should be addressed.

Associate Editor: Alfonso Valencia

Received on October 5, 2017; revised on March 15, 2018; editorial decision on April 23, 2018; accepted on April 30, 2018

## Abstract

**Motivation:** Computational prediction of the effect of mutations on protein stability is used by researchers in many fields. The utility of the prediction methods is affected by their accuracy and bias. Bias, a systematic shift of the predicted change of stability, has been noted as an issue for several methods, but has not been investigated systematically. Presence of the bias may lead to misleading results especially when exploring the effects of combination of different mutations.

**Results:** Here we use a protocol to measure the bias as a function of the number of introduced mutations. It is based on a self-consistency test of the reciprocity the effect of a mutation. An advantage of the used approach is that it relies solely on crystal structures without experimentally measured stability values. We applied the protocol to four popular algorithms predicting change of protein stability upon mutation, FoldX, Eris, Rosetta and I-Mutant, and found an inherent bias. For one program, FoldX, we manage to substantially reduce the bias using additional relaxation by Modeller. Authors using algorithms for predicting effects of mutations should be aware of the bias described here.

**Availability and implementation:** All calculations were implemented by in-house PERL scripts.

**Contact:** ivankov13@gmail.com

**Supplementary information:** [Supplementary data](#) are available at *Bioinformatics* online.

**Note:** The article 10.1093/bioinformatics/bty348, published alongside this paper, also addresses the problem of biases in protein stability change predictions.

## 1 Introduction

Protein stability, a feature largely defined by protein sequence (Anfinsen *et al.*, 1961; Tanford, 1968), is one of the most important factors that defines the function of globular proteins (Tanford, 1968). Experimental measurements of change of protein stability caused by mutations are laborious and feasible only for proteins that can be purified (Stevens, 2000). Therefore, the computational prediction of the effect of amino acid changes on protein structure and stability has become vital to many fields, including medical applications (Kiel and Serrano, 2014), protein design (Goldenzweig *et al.*, 2016) and evolutionary biology (Shah *et al.*, 2015; Tokuriki *et al.*, 2007) to name a few key fields.

Several computational methods for prediction of the effect of amino acid changes on protein stability are available, which differ in processing time and accuracy (Benedix *et al.*, 2009; Capriotti *et al.*, 2005b; Gilis and Rooman, 2000; Guerois *et al.*, 2002; Rohl *et al.*, 2004; Seeliger and de Groot, 2010; Yin *et al.*, 2007). The molecular dynamics protocol that uses alchemical free energy simulations is the most time-consuming method that shows the highest correlation with experimental data, up to  $r=0.86$  (Seeliger and de Groot, 2010). Programs such as FoldX (Guerois *et al.*, 2002; Schymkowitz *et al.*, 2005), Eris (Yin *et al.*, 2007) and Rosetta (Rohl *et al.*, 2004) manipulate structures more quickly, resulting in correlations with experimental change in free energy in independent tests of  $r=0.50$  for FoldX and  $r=0.26$  for Rosetta (Eris was not assessed) (Potapov *et al.*, 2009). Machine-learning methods such as I-Mutant (Capriotti *et al.*, 2005a,b) work even faster; I-Mutant achieves correlation of  $r=0.54$  (Potapov *et al.*, 2009) based solely on the original protein structure or sequence, without requiring construction of the mutant protein structure.

Accuracy is usually used as the main and only descriptor of a method's utility. Developers and testers of the programs for prediction of the change in protein stability attempt to maximize and quantify accuracy (Potapov *et al.*, 2009). Although it has been reported that some methods are biased, the datasets used to detect the bias were small (Capriotti *et al.*, 2008; Christensen and Kepp, 2012; Frappier *et al.*, 2015; Thiltgen and Goldstein, 2012), and it has not been systematically investigated.

A straightforward approach to detect the bias in the measurements of protein stability is to rely on the principle of symmetry, a common feature in several areas of physics. Specifically, for a state function the values of the function for forward and reverse changes sum up to zero. This idea was used by several authors to detect the bias in different programs predicting the effect of protein substitutions. First, Capriotti *et al.* (2008) noticed that the methods could suffer from the bias without quantifying the effect. Frappier *et al.* (2015) found the bias after application of the prediction methods to a dataset containing 303 stabilizing and destabilizing mutations. To estimate the bias quantitatively, Christensen and Kepp (Christensen and Kepp, 2012) measured the deviation of the reverse change of stability from that expected from the forward ones, where both wild-type and mutant structures were produced by homology modeling. Next, Thiltgen and Goldstein measured the bias on the small dataset of 65 pairs (Thiltgen and Goldstein, 2012). Finally, Fariselli *et al.* when developing the INPS method (Fariselli *et al.*, 2015), avoided the bias by adding symmetrical mutations to the training dataset to make it ideally balanced.

Here we measure systematically and accurately the bias inherent to methods predicting change of protein stability as a function of the number of introduced mutations. Compared to previous realizations, our approach has one or more of the following advantages.

First, it does not use any experimental data on protein stabilities or change of protein stability. Second, it uses protein crystal structures and the computational method without requiring additional structure predictions or manipulations. Our dataset contains thousands of protein structure pairs. Finally, it is independent of protein structures being wild-type because processing forward and reverse substitutions are identical in terms of computational procedures. We explored the presence of the bias for four of the most popular prediction algorithms, FoldX (Guerois *et al.*, 2002; Schymkowitz *et al.*, 2005), Eris (Yin *et al.*, 2007), Rosetta (Rohl *et al.*, 2004) and I-Mutant (Capriotti *et al.*, 2005a,b). We found that all four algorithms have an inherent bias, whereby for many instances the effect of the forward and the reverse substitution was predicted to be substantially different in magnitude. The value of the bias increases with the number of introduced amino acid substitutions.

## 2 Materials and methods

### 2.1 Dataset

We created a high-quality dataset of the protein structures differing by few amino acid residues (from one to ten). For that, we retained from protein data bank (PDB, www.rcsb.org) (Berman *et al.*, 2000):

1. X-ray determined structures with resolution lower than 2.5 Å;
2. monomeric structures (according to the REMARK 350 of PDB header). If several chains were presented in the PDB file, we selected the first one;
3. PDB structures without unresolved backbone atoms coordinates;
4. PDB structures without non-standard residues.

In the dataset built from the sequences of the selected PDB files we found pairs of structures differing by one to ten amino acids (the number of found pairs is given in the Supplementary Table S1) using stand-alone version of BLAST (Altschul, 1997). From every set of pairs differing by a given number of mutations, we selected all pairs if their number was lower than 1000; otherwise, we chose 1000 pairs at random to minimize the computation time, the list is given in the Supplementary Table S2.

### 2.2 FoldX

We used FoldX (Guerois *et al.*, 2002; Schymkowitz *et al.*, 2005) 4.0 version (<http://foldxsuite.crg.eu/products>), predictions are given in Supplementary Table S2. At the moment, FoldX does not have a web-server version.

During a single run of 'BuildModel' procedure, FoldX samples different rotamers of the new amino acid residue from the rotamer library to achieve a lower free energy. The recommendation is to make one run; to check the convergence, multiple runs can be done (FoldX manual, <http://foldxsuite.crg.eu/command/BuildModel>). We found that the bias itself is not changed (both for the default protocol and for the modified one, see Section 3.4), while the standard deviation of the bias decreases with the number of models. So, to increase the reliability of the presented results we used ten-run modeling.

### 2.3 Eris

We used the stand-alone version v1.0 of Eris (Yin *et al.*, 2007) with default parameters. We renumbered amino acid residues in PDB files starting with 1 and retaining only the first protein chain with small molecules belonging to that chain. The web-version can be found at <http://redshift.med.unc.edu/eris/login.php>.

## 2.4 Rosetta

We used Rosetta (Rohl *et al.*, 2004) version 32.58837. We renumbered amino acid residues in PDB files starting with 1 and retaining only the first protein chain with small molecules belonging to that chain. Then we made five relaxed structures by ‘relax’ procedure of Rosetta package with parameters ‘-relax: dualspace true; -ex1; -ex2; -use\_input\_sc; -flip\_HNQ; -no\_optH false; -relax: min\_type lbfgs\_armijo\_nonmonotone; -ignore\_unrecognized\_res; -database \$ROSETTA/main/database; -nstruct 5; -nonideal’. Then we chose the structure with the lowest free energy. In that structure we calculated change of stability using the ‘ddg\_monomer’ procedure of Rosetta package with parameters ‘-ddg::iterations 3; -ddg::dump\_pdb false; -ignore\_unrecognized\_res; -ddg::local\_opt\_only false; -ddg::suppress\_checkpointing true; -in::file::fullatom; -ddg: min\_cst true; -ddg: mean false; -ddg: min true; -ddg: sc\_min\_only false; -ddg: ramp\_repulsive true; -ddg: opt\_radius 12.0; -score: fa\_max\_dis 9.0; -ddg::output\_silent true’.

## 2.5 I-Mutant

I-Mutant (Capriotti *et al.*, 2005a,b) is a machine-learning method trained to estimate free energy change of single mutations in two modes: based on protein structure or protein sequence alone. The algorithm was trained to rely on the character of the mutation and the environment of the mutated position. For structural prediction the neighboring residues in physical space are used (or their absence in case of solvent-accessible position), and for sequence-based prediction a sequence window of  $\pm 9$  residues is used (Capriotti *et al.*, 2005a,b). The web-version can be found at <http://folding.biofold.org/cgi-bin/i-mutant2.0.cgi>. We used stand-alone version of I-Mutant 3.0 in PDB mode (i.e. predicting change of stability using the protein crystal structure) with default options.

## 2.6 Relaxation of structure by Modeller

We used Modeller (Webb and Sali, 2014) version 9v4 following the basic procedure for modelling a sequence with high identity to template. For each protein structure in question we generated with Modeller ten models of wild-type sequence and ten models of mutant sequence. Then for each Modeller model we ran ten rounds of FoldX RepairPDB and took final stability. Finally, we calculated the difference between average stability of ten mutant models and ten wild type models.

## 3 Results

### 3.1 Measurement of the bias

Using pairs of homologous proteins with known structure, we used the following protocol for accurate measurement of the bias in prediction of protein change of stability after mutation, which can be described as follows [see also (Christensen and Kepp, 2012; Frappier *et al.*, 2015; Thiltgen and Goldstein, 2012)].

Suppose, we have protein structures A and B having free energy change of folding  $\Delta G_A$  and  $\Delta G_B$  differing by one amino acid in the position X: structure A has residue  $X_A$ , while structure B has residue  $X_B$  (Fig. 1). Let  $\Delta\Delta G_{AB} = \Delta G_B - \Delta G_A$  be the free energy change of structure A due to mutation  $X_A \rightarrow X_B$ , where  $\Delta G_A$  and  $\Delta G_B$  are folding free energies of the structures A and B, respectively. Similarly,  $\Delta\Delta G_{BA} = \Delta G_A - \Delta G_B$  is the free energy change of structure B due to mutation  $X_B \rightarrow X_A$ . From the definition of  $\Delta\Delta G_{AB}$  and  $\Delta\Delta G_{BA}$ :

$$\Delta\Delta G_{AB} = -\Delta\Delta G_{BA}, \text{ or}$$

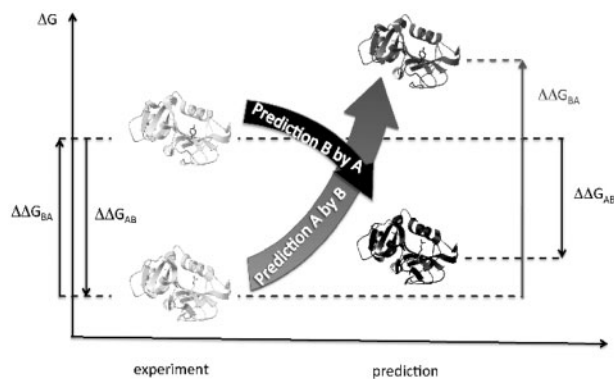

**Fig. 1.** Design of the protocol. Two example protein structures, A and B, differing by one amino acid residue are shown on the left. If we measure free energy change for the forward and reverse mutations, their sum must be zero:  $\Delta\Delta G_{AB} + \Delta\Delta G_{BA} = 0$  (arrows on the left). For predicted destabilizations (shown on the right), their sum may not be zero due to errors. Here, the case is given, when  $\Delta\Delta G_{AB} + \Delta\Delta G_{BA} > 0$

$$\Delta\Delta G_{AB} + \Delta\Delta G_{BA} = 0.$$

However, calculations are not ideal: to obey this equation, programs should generate the lowest energy structure B from the structure A and *vice versa*, which may be hard, considering internal specific features of the programs. FoldX, for instance, does not move backbone chain upon mutation; it also does not move sidechains of all residues but neighbors. As a result, we expect the modeled structure B to be less stable than the crystal structure B by some value  $\delta_{AB}$ . Similarly, modeled structure A is expected to be less stable than the crystal structure A by some value  $\delta_{BA}$ :

$$\Delta\Delta G_{AB} + \Delta\Delta G_{BA} = \delta_{AB} + \delta_{BA}, \text{ or}$$

$$\Delta\Delta G_{AB} = -\Delta\Delta G_{BA} + (\delta_{AB} + \delta_{BA}).$$

In this way, we can measure sum of the two delta values ( $\delta_{AB} + \delta_{BA}$ ) and calculate the average bias per mutation as  $\langle (\delta_{AB} + \delta_{BA}) / 2 \rangle = \langle (\Delta\Delta G_{AB} + \Delta\Delta G_{BA}) / 2 \rangle$  considering all available protein pairs A and B.

The used approach can be extended to pairs of structures that differ by more than one amino acid substitution. The advantage of the approach is that it does not depend in any way on the experimental determination of the free energy of the protein structure. Furthermore, it does not depend on the knowledge of which of the two sequences, if any, is the wild type variant.

### 3.2 The bias for single and multiple substitutions

For single substitutions the average bias  $(\Delta\Delta G_{BA} + \Delta\Delta G_{AB})/2$  significantly deviates from zero (Table 1 and Fig. 2), ranging from  $0.74 \pm 0.05$  kcal/mol for FoldX to  $2.08 \pm 0.12$  kcal/mol for Rosetta. The clouds in Figure 2a–d consist of pairs near the non-biased line  $\Delta\Delta G_{BA} = -\Delta\Delta G_{AB}$  that do not contribute to the bias and a dispersed group of points that comprises the bias. We investigated influence of different factors for one of the program, FoldX. We found that mutations in more buried positions and mutations with more dramatic change in the amino acid size tend to give larger bias (Supplementary Fig. S3). The change in hydrophobicity, change in charge of the mutated residues, and other factors have little or no influence on the bias (Supplementary Fig. S3).

We also investigated the bias for multiple mutants (Fig. 3) for FoldX, Eris and Rosetta (I-Mutant was not studied because it does not allow input of multiple mutations). The bias increases with the

number of introduced mutations (from two to ten); however, the increment becomes less pronounced with additional mutations.

### 3.3 Influence of additional parameters on the bias for FoldX

We took one program, FoldX, as an example, and introduced some modifications in its default protocol to reduce or eliminate the bias. To reduce the running time of the modeling, we sampled 100 random pairs from the original pool of pairs differing by the one to ten substitutions. For reference, the bias for the default protocol of FoldX for 100-pairs subsample for single substitution was  $0.80 \pm 0.16$  kcal/mol.

#### 3.3.1 Initial relaxation of protein structure

Most programs manipulating protein structures as the first step of the algorithm prepare the protein structure to avoid artifacts coupled with the initial unrelaxed structure. In FoldX this procedure is called 'RepairPDB'. First, it recovers all absent atoms and residues in the protein, then flips Asp, Gln and His side chains to avoid incorrect 180-degree rotation. Then, for amino acid residues with high free energy it tests different rotamers from the rotamer library to obtain a better free energy estimation. The recommendation of the FoldX manual is to use RepairPDB once (<http://foldxsuite.crg.eu/command/RepairPDB>), as we have done to obtain the data shown in the previous section.

In a computational experiment, one may want to consider changes of free energy of completely different proteins in one pool.

**Table 1.** Bias for single substitutions

| Program  | Bias, kcal/mol  | $r$ ( $P$ -value)               | Binary fraction of errors |
|----------|-----------------|---------------------------------|---------------------------|
| FoldX    | $0.74 \pm 0.05$ | $-0.15$ ( $10^{-11}$ )          | 0.35                      |
| Eris     | $1.25 \pm 0.11$ | $-0.39$ ( $2 \times 10^{-49}$ ) | 0.27                      |
| Rosetta  | $2.08 \pm 0.12$ | $-0.06$ (0.04)                  | 0.51                      |
| I-Mutant | $0.80 \pm 0.01$ | $-0.13$ ( $3 \times 10^{-8}$ )  | 0.74                      |

Note: Bias is given for an individual substitution, i.e.  $\text{bias} = (\Delta\Delta G_{AB} + \Delta\Delta G_{BA})/2$ , with the standard error of mean.  $r$ , Pearson correlation coefficient with the associated  $P$ -value. Binary fraction of errors is the fraction of errors in binary classification. A pair was considered as correctly classified if the signs of forward and reverse change of stability were opposite.

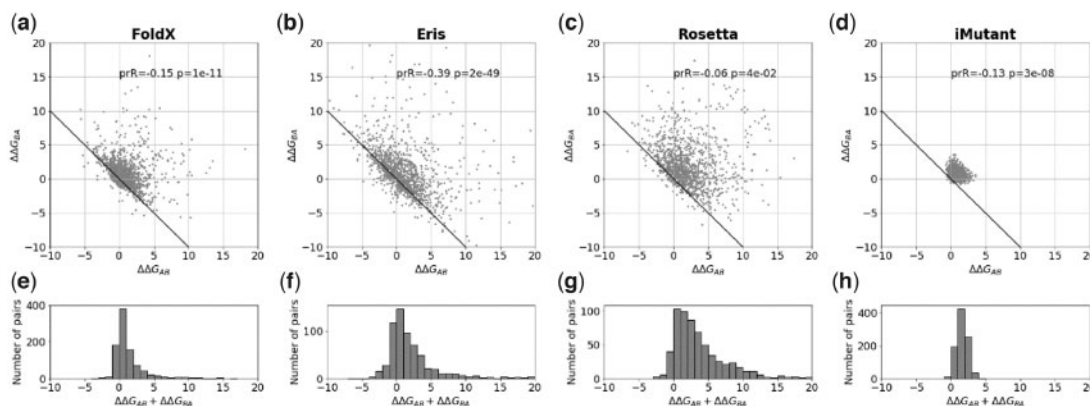

**Fig. 2.** The bias for single substitutions for FoldX, Eris, Rosetta and I-Mutant. (a–d) The relationship between predicted changes of stability  $\Delta\Delta G_{AB}$  and  $\Delta\Delta G_{BA}$  for the forward and reverse mutations, where the structures A and B differ by a single substitution. The 'ideal' relationship  $\Delta\Delta G_{AB} + \Delta\Delta G_{BA} = 0$  is shown as a solid line. Because of symmetry of the protocol, every pair of structures A and B is plotted as (A; B) and (B; A), so the plot is symmetric relative to the  $y=x$  line. 'prR' and 'p' are the Pearson correlation coefficient and the associated  $P$ -value. (e–h) The histograms of the sum of two changes of stability  $\Delta\Delta G_{AB} + \Delta\Delta G_{BA}$  for the forward and reverse mutations for FoldX, Eris, Rosetta and I-Mutant, respectively

To avoid possible artifacts coupled with unequal relaxation of different proteins, one may require the full relaxation of protein structures, i.e. the free energy after the relaxation should reach a plateau (within a reasonable threshold, we chose here 0.1 kcal/mol). We found that FoldX reaches a plateau only after 7–10 rounds of RepairPDB (Supplementary Fig. S4).

Thus, a possible concern for the default FoldX procedure is that an incomplete initial relaxation influences the predicted values of stability change and the bias. To test this possibility, we made ten rounds of RepairPDB instead of the default single round. We found that, on average, change of stability ( $r = 0.99$ , slope = 1.01 when intercept fixed at zero) and the bias ( $r = 0.99$ , slope = 0.97 when intercept fixed at zero) were the same (Supplementary Fig. S5). So, full initial relaxation of the structures, although being physically reasonable, does not reduce the bias.

#### 3.3.2 Additional relaxation after introducing mutations

The residues are mutated in FoldX by the procedure called 'BuildModel'. In the mutated position, BuildModel removes the original residue and assigns different rotamers for the new residue from the rotamer library. Simultaneously, BuildModel reconsiders the side-chain of the residues neighboring the mutated residue in physical space since the new amino acid residue may bump into its

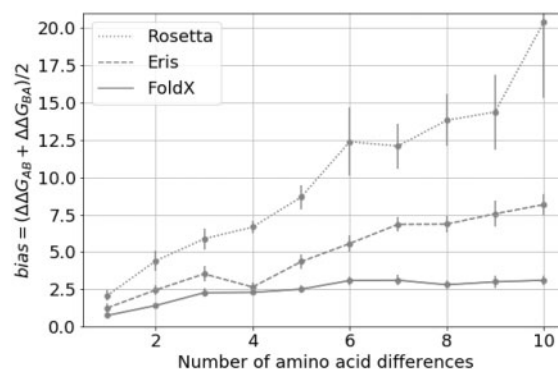

**Fig. 3.** The bias for multiple mutations for FoldX, Eris and Rosetta. The individual value of the bias depending on the number of amino acid substitutions separating protein variants A and B in pair of structures. The error bars represent 3 standard errors of mean



neighbors. The final prediction of the free energy change is calculated as the difference in free energy between the mutant structure and the reference wild-type structure. For better prediction, BuildModel moves 'the same neighbours in the WT and in the mutant producing for each mutant PDB a corresponding PDB for its WT' (FoldX manual, <http://foldxsuite.crg.eu/command/BuildModel>).

FoldX changes only the mutated position and several neighbors keeping the rest of the protein structure the same, which may seem like a biologically unrealistic requirement. We checked if the independent relaxation of the rest of the structure of mutant and the corresponding wild-type protein can decrease the bias. The additional relaxation indeed helps, and ten rounds are needed again to achieve full relaxation (Supplementary Fig. S6) decreasing the bias to  $0.61 \pm 0.13$  kcal/mol for single mutations (Fig. 4, gray bars), or  $\sim 25\%$  lower than before. For multiple mutants, the reduction was even more significant (Fig. 4, white and gray bars).

### 3.4 Using Modeller to decrease the bias of FoldX

FoldX does not move the backbone upon mutation, which may be the reason for the bias found here. To test this hypothesis, after mutation we used Modeller (Webb and Sali, 2014) to relax the structure including the backbone. After that, we applied ten-fold relaxation by FoldX, because the Modeller force-field could not be optimal for FoldX force-field.

We found that using Modeller for single mutants of FoldX removes the bias (Fig. 4, black bars) but at a cost of increasing the noise of the predictions (Supplementary Fig. S7). For multiple mutants using Modeller did not eliminate the bias; nevertheless, it was reduced significantly for structures differing by as many as eight substitutions. For sequences with eight to ten mutations Modeller did not reduce the observed bias (Fig. 4).

All physically reasonable modifications to the default protocol suggested here require additional computations; however, for more careful analysis one might prefer a more accurate but slower protocol, with the necessary computations, which can be performed in a feasible timeframe on a computational cluster.

## 4 Discussion

We accurately and systematically measured the bias for programs predicting the effect of substitutions on protein stability, for one to ten substitutions. The design of the protocol allows its application without knowing any experimental data on protein free energy change (Christensen and Kepp, 2012; Frappier *et al.*, 2015; Thiltgen and Goldstein, 2012). The protocol uses two protein structures differing by one or several mutations. A program predicts protein free energy change upon mutations in the forward and reverse directions, and the bias is detected if the sum of free energy changes deviates, on average, from zero. We used the protocol on four representative programs, FoldX (Guerois *et al.*, 2002; Schymkowitz *et al.*, 2005), Eris (Yin *et al.*, 2007), Rosetta (Rohl *et al.*, 2004) and I-Mutant (Capriotti *et al.*, 2005a,b), and showed that they have an inherent bias in the prediction of the mutation effect. For single mutants, the bias was  $0.74 \pm 0.05$  kcal/mol for FoldX,  $1.25 \pm 0.11$  kcal/mol for Eris,  $2.08 \pm 0.12$  kcal/mol for Rosetta and  $0.80 \pm 0.01$  kcal/mol for I-Mutant (Table 1).

The bias was noticed before. For example, Christensen and Kepp (2012) in their investigation of beta-lactamase mutants estimated the bias for FoldX equal to  $\sim 0.5$  kcal/mol. It is close to our results for single mutants; however, their estimate characterizes both single

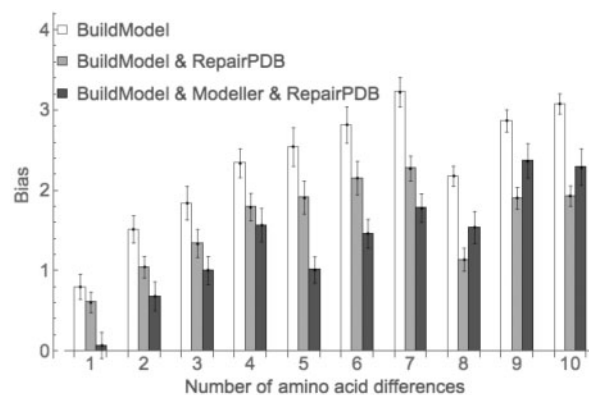

Fig. 4. The bias for different modifications of the default protocol of FoldX. The error bars represent standard error of mean

and multiple mutants together, making it impossible to differentiate between the influence of single mutations and their interactions. Moreover, to estimate the bias they used protein models obtained by homology modeling. These manipulations lead to additional uncertainty about the nature of the observed bias. In the work (Thiltgen and Goldstein, 2012) the authors found the values for the bias, which agrees to our results, but only for single mutations and using only 65 protein pairs.

The exact reasons for the observed bias and reduced accuracy on a balanced dataset remain largely obscure. One of the reasons, general to all the programs, could be that programs are trained on experimental datasets which have much more destabilizing mutations than stabilizing ones, as discussed in (Capriotti *et al.*, 2008). Therefore, if such programs are given a balanced dataset (as we use here), then the algorithm will predict more destabilizing mutations, reflecting the tendencies of the training dataset.

The reason specific to FoldX could be that FoldX fixes the backbone when making the mutant structure. Obviously, the fixed backbone is optimal for the starting structure, not the mutated one, which is expected to estimate the prediction to be more destabilizing. When applying FoldX to a balanced dataset of 84 mutations (42 forward and 42 reverse) in the original paper (Guerois *et al.*, 2002) the authors used additional relaxation by WHATIF program (Vriend, 1990) for the mutation increasing the sidechain. In that way, they were able to obtain unbiased results [see Fig. 3 in Guerois *et al.* (2002)]. Using WHATIF program was similar to our usage of Modeller in the present work.

For I-Mutant, the specific factor could be that it considers the sequence/structure context of the mutated position. The context contribution is the same both for forward and reverse mutations. Being trained on a dataset containing more destabilizing mutations it may erroneously predict that some context on average creates more destabilized predictions.

The identification of the bias does not immediately lead to a better prediction of experimental mutation effects because it is not clear if the bias results from misestimating the impact of the forward or the reverse mutation. For example, in independent tests I-Mutant showed the strongest correlation between experimental and predicted effects of mutations (Potapov *et al.*, 2009); however, I-Mutant was also the noisiest method in our test (Fig. 2d). This suggests, that in our work we tested for different parameters of quality of prediction programs than are explored by test for agreement with experimental data. Hopefully, the bias explored here may be addressed in the course of development of new approaches [as in

INPS (Fariselli et al., 2015)], or modification of the existing methods for prediction of free energy change (Christensen and Kepp, 2013, 2012). For example, the protocol used here can be utilized as an independent training part of new programs, when a program requires the forward and reverse mutations to have opposite effects.

There are situations when the bias does not influence the interpretation of the results. One of them is when we compare protein variants that have the same number of mutations and are generated from the same template structure. In this case the bias is, on average, the same for all mutants (Sarkisyan et al., 2016; Tokuriki et al., 2007). Otherwise, mutant structures obtained from the same reference structure but with different number of substitutions will have different bias, which will make them hard to compare.

To summarize, we measured accurately and systematically the bias in prediction of change in protein structure stability, both for single and multiple substitutions, utilizing the protocol based on self-consistency. The users might evaluate if the bias can influence the interpretation of their results. The developers could reduce or remove the bias from the predictions by using artificially completed balanced datasets or by requiring the method to predict the same but opposite in sign effects for forward and reverse mutations. Our findings have important applications in the studies involving the protein structure destabilization predictions.

## Acknowledgements

We thank Rita Casadio and Emidio Capriotti for providing us with stand-alone version of I-Mutant 3.0 and Nikolay V. Dokholyan for providing us with stand-alone version of Eris. We thank Alexander S. Mishin for technical support.

## Funding

This work was supported by the HHMI International Early Career Scientist Program [55007424], the MINECO [BFU2015-68723-P], Spanish Ministry of Economy and Competitiveness Centro de Excelencia Severo Ochoa 2013-2017 [grant SEV-2012-0208], Secretaria d'Universitats i Recerca del Departament d'Economia i Coneixement de la Generalitat's AGAUR [program 2014 SGR 0974], the European Research Council under the European Union's Seventh Framework Programme [FP7/2007-2013, ERC grant agreement 335980\_EinME] and Russian Scientific Foundation (RSF #14-24-00157, the part about I-Mutant calculations). The work was started at the School of Molecular and Theoretical Biology supported by the Dynasty Foundation.

*Conflict of Interest:* none declared.

## References

Altschul,S.F. (1997) Gapped BLAST and PSI-BLAST: a new generation of protein database search programs. *Nucleic Acids Res.*, **25**, 3389–3402.  
 Anfinsen,C.B. et al. (1961) The kinetics of formation of native ribonuclease during oxidation of the reduced polypeptide chain. *Proc. Natl. Acad. Sci. USA*, **47**, 1309–1314.  
 Benedix,A. et al. (2009) Predicting free energy changes using structural ensembles. *Nat. Methods*, **6**, 3–4.

Berman,H.M. et al. (2000) The Protein Data Bank. *Nucleic Acids Res.*, **28**, 235–242.  
 Capriotti,E. et al. (2008) A three-state prediction of single point mutations on protein stability changes. *BMC Bioinformatics*, **9**, S6.  
 Capriotti,E. et al. (2005a) I-Mutant2.0: predicting stability changes upon mutation from the protein sequence or structure. *Nucleic Acids Res.*, **33**, W306–W310.  
 Capriotti,E. et al. (2005b) Predicting protein stability changes from sequences using support vector machines. *Bioinformatics*, **21**, ii54–ii58.  
 Christensen,N.J. and Kepp,K.P. (2012) Accurate stabilities of laccase mutants predicted with a modified FoldX protocol. *J. Chem. Inf. Model.*, **52**, 3028–3042.  
 Christensen,N.J. and Kepp,K.P. (2013) Stability mechanisms of laccase isoforms using a modified FoldX protocol applicable to widely different proteins. *J. Chem. Theory Comput.*, **9**, 3210–3223.  
 Fariselli,P. et al. (2015) INPS: predicting the impact of non-synonymous variations on protein stability from sequence. *Bioinformatics*, **31**, 2816–2821.  
 Frappier,V. et al. (2015) ENCoM server: exploring protein conformational space and the effect of mutations on protein function and stability. *Nucleic Acids Res.*, **43**, W395–W400.  
 Gilis,D. and Rooman,M. (2000) PoPMuSiC, an algorithm for predicting protein mutant stability changes: application to prion proteins. *Protein Eng.*, **13**, 849–856.  
 Goldenzweig,A. et al. (2016) Automated structure- and sequence-based design of proteins for high bacterial expression and stability. *Mol. Cell*, **63**, 337–346.  
 Guerois,R. et al. (2002) Predicting changes in the stability of proteins and protein complexes: a study of more than 1000 mutations. *J. Mol. Biol.*, **320**, 369–387.  
 Kiel,C. and Serrano,L. (2014) Structure-energy-based predictions and network modelling of RASopathy and cancer missense mutations. *Mol. Syst. Biol.*, **10**, 727.  
 Potapov,V. et al. (2009) Assessing computational methods for predicting protein stability upon mutation: good on average but not in the details. *Protein Eng. Des. Sel.*, **22**, 553–560.  
 Rohl,C.A. et al. (2004) Protein structure prediction using Rosetta. *Methods Enzymol.*, **383**, 66–93.  
 Sarkisyan,K.S. et al. (2016) Local fitness landscape of the green fluorescent protein. *Nature*, **533**, 397–401.  
 Schymkowitz,J. et al. (2005) The FoldX web server: an online force field. *Nucleic Acids Res.*, **33**, W382–W388.  
 Seeliger,D. and de Groot,B.L. (2010) Protein thermostability calculations using alchemical free energy simulations. *Biophys. J.*, **98**, 2309–2316.  
 Shah,P. et al. (2015) Contingency and entrenchment in protein evolution under purifying selection. *Proc. Natl. Acad. Sci. USA*, **112**, E3226–E3235.  
 Stevens,R.C. (2000) High-throughput protein crystallization. *Curr. Opin. Struct. Biol.*, **10**, 558–563.  
 Tanford,C. (1968) Protein denaturation. *Adv. Protein Chem.*, **23**, 121–282.  
 Tokuriki,N. et al. (2007) The stability effects of protein mutations appear to be universally distributed. *J. Mol. Biol.*, **369**, 1318–1332.  
 Thiltgen,G. and Goldstein,R.A. (2012) Assessing predictors of changes in protein stability upon mutation using self-consistency. *PLoS ONE*, **7**, e46084.  
 Vriend,G. (1990) WHAT IF: a molecular modeling and drug design program. *J. Mol. Graph.*, **8**, 52–56, 29.  
 Webb,B. and Sali,A. (2014) Comparative protein structure modeling using Modeller. *Curr. Protoc. Bioinf.*, **47**, 5.6.1–5.6.32.  
 Yin,S. et al. (2007) Eris: an automated estimator of protein stability. *Nat. Methods*, **4**, 466–467.
